# Supplementary material for: Schistocyte quantitation, thrombotic microangiopathy and acute kidney injury in Australian snakebite coagulopathy [ASP28]
Source: PubMed Central journal article supplement (PMC8519151; doi:10.1111/ijlh.13497), 2021-02-22
Supplement: IJLH-43-959-s001.pdf [file IJLH-43-959-s001.pdf]

## Supplementary materials

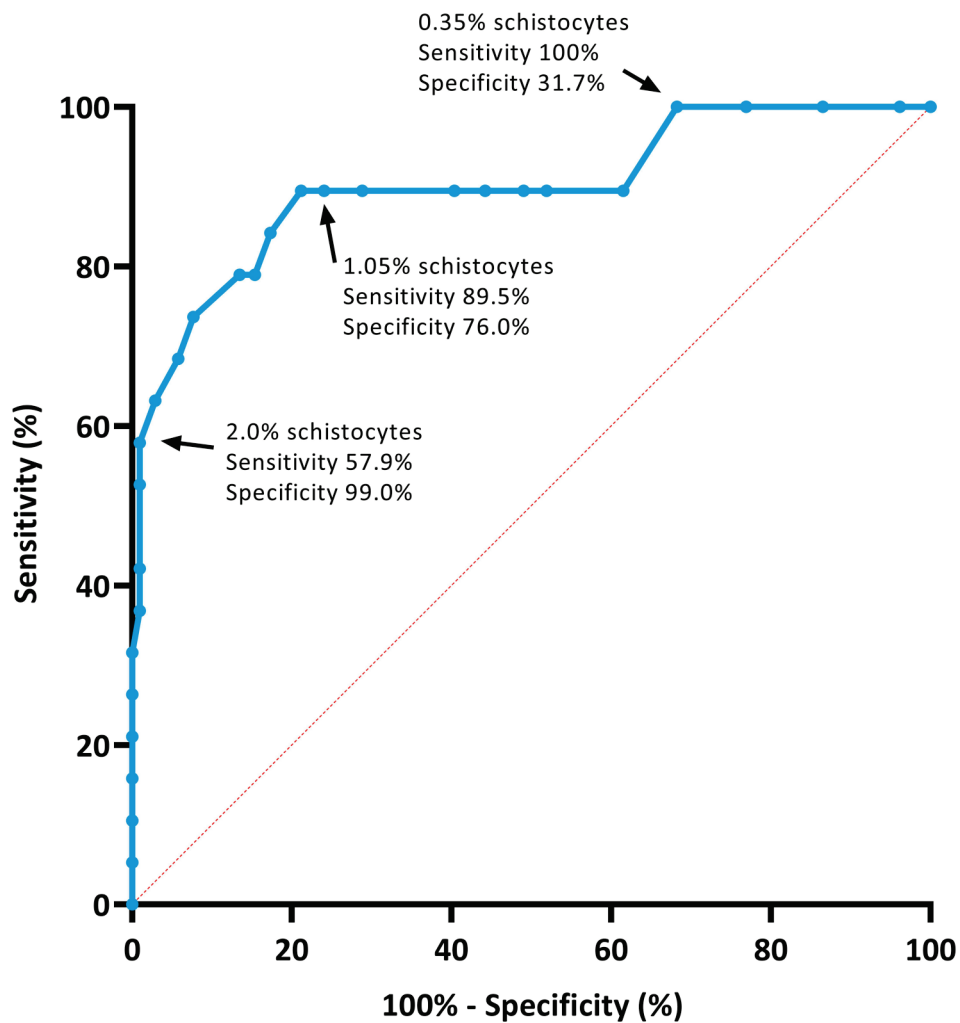

**Figure S1.** Receiver Operating Characteristic (ROC) curve for International Council for Standardization in Haematology (ICSH) method of schistocyte quantitation for venom-induced consumption coagulopathy (VICC) with acute kidney injury (AKI) versus VICC without AKI

**Table S1.** Sensitivity and specificity for International Council for Standardization in Haematology method of schistocyte quantitation for venom induced consumption coagulopathy (VICC) with acute kidney injury (AKI) versus VICC without AKI

| Schistocytes % | Sensitivity % | 95% CI         | Specificity % | 95% CI        | Likelihood ratio |
|----------------|---------------|----------------|---------------|---------------|------------------|
| > 0.05         | 100           | 83.2% - 100%   | 3.85          | 1.51% - 9.47% | 1.04             |
| > 0.15         | 100           | 83.2% - 100%   | 13.5          | 8.19% - 21.3% | 1.16             |
| > 0.25         | 100           | 83.2% - 100%   | 23.1          | 16.0% - 32.0% | 1.30             |
| > 0.35         | 100           | 83.2% - 100%   | 31.7          | 23.6% - 41.2% | 1.46             |
| > 0.45         | 89.5          | 68.6% - 98.1%  | 38.5          | 29.7% - 48.1% | 1.45             |
| > 0.55         | 89.5          | 68.6% - 98.1%  | 48.1          | 38.7% - 57.6% | 1.72             |
| > 0.65         | 89.5          | 68.6% - 98.1%  | 51.0          | 41.5% - 60.4% | 1.82             |
| > 0.75         | 89.5          | 68.6% - 98.1%  | 55.8          | 46.2% - 64.9% | 2.02             |
| > 0.85         | 89.5          | 68.6% - 98.1%  | 59.6          | 50.0% - 68.5% | 2.22             |
| > 0.95         | 89.5          | 68.6% - 98.1%  | 71.2          | 61.8% - 79.0% | 3.10             |
| > 1.05         | 89.5          | 68.6% - 98.1%  | 76.0          | 66.9% - 83.2% | 3.72             |
| > 1.15         | 89.5          | 68.6% - 98.1%  | 78.8          | 70.0% - 85.6% | 4.23             |
| > 1.25         | 84.2          | 62.4% - 94.5%  | 82.7          | 74.3% - 88.8% | 4.87             |
| > 1.35         | 78.9          | 56.7% - 91.5%  | 84.6          | 76.5% - 90.3% | 5.13             |
| > 1.45         | 78.9          | 56.7% - 91.5%  | 86.5          | 78.7% - 91.8% | 5.86             |
| > 1.55         | 73.7          | 51.2% - 88.2%  | 92.3          | 85.6% - 96.1% | 9.58             |
| > 1.65         | 68.4          | 46.0% - 84.6%  | 94.2          | 88.0% - 97.3% | 11.9             |
| > 1.75         | 63.2          | 41.0% - 80.9%  | 97.1          | 91.9% - 99.2% | 21.9             |
| > 2.00         | 57.9          | 36.3% - 76.9%  | 99.0          | 94.8% - 100%  | 60.2             |
| > 2.35         | 52.6          | 31.7% - 72.7%  | 99.0          | 94.8% - 100%  | 54.7             |
| > 2.75         | 42.1          | 23.1% - 63.7%  | 99.0          | 94.8% - 100%  | 43.8             |
| > 3.10         | 36.8          | 19.1% - 59.0%  | 99.0          | 94.8% - 100%  | 38.3             |
| > 3.65         | 31.6          | 15.4% - 54.0%  | 100           | 96.4% - 100%  |                  |
| > 4.80         | 26.3          | 11.8% - 48.8%  | 100           | 96.4% - 100%  |                  |
| > 5.55         | 21.1          | 8.51% - 43.3%  | 100           | 96.4% - 100%  |                  |
| > 6.75         | 15.8          | 5.52% - 37.6%  | 100           | 96.4% - 100%  |                  |
| > 9.50         | 10.5          | 1.87% - 31.4%  | 100           | 96.4% - 100%  |                  |
| > 11.3         | 5.26          | 0.270% - 24.6% | 100           | 96.4% - 100%  |                  |
